# Supplementary material for: Utility Metrics for Evaluating Synthetic Health Data Generation Methods: Validation Study
Source: PubMed Central journal article supplement (PMC9030990; doi:10.2196/35734), 2022-04-07
Supplement: medinform_v10i4e35734_app1.pdf [file medinform_v10i4e35734_app1.pdf]

## Appendix S1: Simulation Datasets

The following datasets were used to compare the results of logistic regression between real and synthetic datasets. All of the datasets are from the UCI machine learning repository except where indicated.

| Data Name                   | Description                                                                                                                                                                                                                                                                                                                                                                                                                            | Number of Records | Number of Variables | Entropy (nats) |
|-----------------------------|----------------------------------------------------------------------------------------------------------------------------------------------------------------------------------------------------------------------------------------------------------------------------------------------------------------------------------------------------------------------------------------------------------------------------------------|-------------------|---------------------|----------------|
| Adult                       | The census income data from 1994 Census database                                                                                                                                                                                                                                                                                                                                                                                       | 44842             | 13                  | 1.193          |
| BankNote                    | Data of images that were taken for the evaluation of tan authentication procedure for banknotes.                                                                                                                                                                                                                                                                                                                                       | 1371              | 5                   | 1.746          |
| Breast Cancer Wisconsin     | Diagnostic Wisconsin Breast Cancer Database                                                                                                                                                                                                                                                                                                                                                                                            | 683               | 9                   | 1.47           |
| Breast Cancer Coimbra       | Diagnostic Coimbra Breast Cancer Database                                                                                                                                                                                                                                                                                                                                                                                              | 116               | 9                   | 1.558          |
| Breast Tissue               | Dataset with electrical impedance measurements of freshly excised tissue samples from the breast.                                                                                                                                                                                                                                                                                                                                      | 106               | 10                  | 1.492          |
| Breast Cancer               | This data is provided by the Oncology Institute to predict the breast cancer.                                                                                                                                                                                                                                                                                                                                                          | 227               | 10                  | 0.975          |
| Chronic Kidney Disease      | This dataset is collected in Apollo Hospital, India. It can be used to predict the chronic kidney disease.                                                                                                                                                                                                                                                                                                                             | 209               | 21                  | 0.93           |
| Heart Disease               | The Cleveland heart database                                                                                                                                                                                                                                                                                                                                                                                                           | 303               | 13                  | 1.158          |
| Colposcopy/green            | The three modalities of data are dedicated to determining two classes of the colposcopic sequences (bad, good).                                                                                                                                                                                                                                                                                                                        | 98                | 56                  | 1.669          |
| Colposcopy/hinselmann       |                                                                                                                                                                                                                                                                                                                                                                                                                                        | 97                | 56                  | 1.684          |
| Colposcopy/schiller         |                                                                                                                                                                                                                                                                                                                                                                                                                                        | 92                | 56                  | 1.806          |
| Cardiotocography (3 class)  | 2126 fetal cardiotocograms (CTGs) were automatically processed and the respective diagnostic features measured. The CTGs were also classified by three expert obstetricians and a consensus classification label assigned to each of them. Classification was both with respect to a morphologic pattern (A, B, C. ...) and to a fetal state (N, S, P). Therefore, the dataset can be used either for 10-class or 3-class experiments. | 2126              | 21                  | 1.291          |
| Cardiotocography (10 class) |                                                                                                                                                                                                                                                                                                                                                                                                                                        | 2126              | 21                  | 1.352          |
| Dermatology                 | Aim for this dataset is to determine the type of Eryhemato-Squamous Disease.                                                                                                                                                                                                                                                                                                                                                           | 358               | 34                  | 0.89           |
| Diabetic Mellitus           | The data is dedicated to determining the type of diabetic mellitus.<br>This dataset is from OpenML.                                                                                                                                                                                                                                                                                                                                    | 281               | 97                  | 0.56           |
| Diabetic Retinopathy        | This dataset contains features extracted from the Messidor image set to predict whether an image contains signs of diabetic retinopathy or not.                                                                                                                                                                                                                                                                                        | 1151              | 19                  | 1.044          |
| Echocardiogram              | Data for classifying if patients will survive for at least one year after a heart attack                                                                                                                                                                                                                                                                                                                                               | 106               | 10                  | 1.534          |
| EEGb Eye State              | All data is from one continuous EEG measurement with the Emotiv EEG Neuroheadset. The data set consists of 14 EEG values and a value indicating the eye state.                                                                                                                                                                                                                                                                         | 14980             | 14                  | 0.076          |
| Lymphography                | This lymphography domain was obtained from the University Medical Centre, Institute of Oncology,                                                                                                                                                                                                                                                                                                                                       | 148               | 18                  | 0.818          |

|                            |                                                                                                                                                                                                              |       |     |       |
|----------------------------|--------------------------------------------------------------------------------------------------------------------------------------------------------------------------------------------------------------|-------|-----|-------|
|                            | Ljubljana, Yugoslavia. This data is dedicated to determining the degree of lymph cancer.                                                                                                                     |       |     |       |
| Mice Protein               | This data contains 77 proteins measured in the cerebral cortex to predict 8 classes of control and Down syndrome when mice exposed to context fear conditioning.                                             | 1080  | 81  | 1.611 |
| Postoperative Patient Data | The classification task of this database is to determine where patients in a postoperative recovery area should be sent to next.                                                                             | 87    | 8   | 0.741 |
| Primary Tumor              | This data is provided by the Oncology Institute to predict the tumor class (lung, head & neck, etc).                                                                                                         | 336   | 15  | 0.619 |
| Stroke                     | Health care database to predict stroke                                                                                                                                                                       | 29072 | 10  | 0.887 |
| Thoracic Surgery           | The data is dedicated to the classification problem related to the post-operative life expectancy in lung cancer patients.                                                                                   | 470   | 16  | 0.57  |
| Thyroid Disease            | The data is from the 6 databases from the Garavan Institute in Sydney, Australia. Thyroid Disease refers to Thyroid0387.data and Thyroid Disease (new) refers to the new-thyroid.data in the UCI repository. | 5786  | 23  | 0.489 |
| Thyroid Disease (new)      |                                                                                                                                                                                                              | 215   | 6   | 1.177 |
| Titanic_train              | The train dataset on Kaggle is a subset of the passenger information on Titanic. This dataset is used to predict whether the passenger survived or not.<br>This dataset is from Kaggle.                      | 891   | 8   | 0.778 |
| Z-Alizadeh Sani            | This data is used to predict two possible categories of CAD (normal or not normal).                                                                                                                          | 303   | 56  | 0.89  |
| Colon Cancer               | The dataset was from an oncology trial, N0147, from Project Data Sphere (PDS) <sup>1</sup> [1].                                                                                                              | 1543  | 10  | 0.769 |
| Colon Cancer Registry      | A prospectively maintained Danish Colorectal Cancer Group (DCCG) database including all Danish patients with a first-time diagnosis of right-sided colonic cancer between 2001 and 2018 [2]. <sup>2</sup>    | 12855 | 192 | 0.356 |

<sup>1</sup> See <<https://data.projectdatasphere.org/>>

<sup>2</sup> This dataset was obtained directly from the Danish registry and can be requested from DCCG.

## Appendix S2: Additional Details on Utility Metrics

### Multivariate Hellinger Distance

The Bhattacharyya distance is the degree of dissimilarity between two probability distributions [3]. It is widely used in the areas of, for example, image segmentation, and feature extraction [4],[5].

Consider the probability distributions  $p$  and  $q$  over the same domain  $X$ , the Bhattacharyya distance is defined as:

$$D_B(p, q) = -\ln(BC(p, q)) \quad (1)$$

where, the Bhattacharyya coefficient can be computed for discrete distributions as follows:

$$BC(p, q) = \sum_{x \in X} \sqrt{p(x)q(x)} \quad (2)$$

And for continuous probability distributions:

$$BC(p, q) = \int \sqrt{p(x)q(x)} dx \quad (3)$$

It is not limited to computing the similarity between two univariate distributions. For a multivariate normal distribution, the Bhattacharyya Distance is as follows:

$$D_B(X, Y) = \frac{1}{2} \log \left( \frac{|\Sigma_X|}{\sqrt{|\Sigma_X||\Sigma_Y|}} \right) + \frac{1}{8} (\mu_X - \mu_Y)^T \Sigma^{-1} (\mu_X - \mu_Y) \quad (4)$$

where  $X \sim N(\mu_X, \Sigma_X)$ ,  $Y \sim N(\mu_Y, \Sigma_Y)$ , and  $\Sigma = \frac{1}{2}(\Sigma_X + \Sigma_Y)$ .

The Hellinger distance can be derived from Bhattacharyya distance and has the advantage that it is bounded between zero and one, and hence is more interpretable [6]. We therefore use the Hellinger distance computed on the multivariate normal distribution.

### Wasserstein Distance

In the context of optimal transport planning, the Wasserstein distance evaluates the effort it needs to transport the distribution of mass  $\mu(x)$  on a space  $X$  to the distribution  $\nu(x)$  on the same space. Given the transport plan to move from point  $x$  to point  $y$  is  $\gamma(x, y)$  and the cost function is  $c(x, y)$ , the optimal cost can be defined as:

$$C = \inf_{\gamma \in \Gamma(\mu, \nu)} \int c(x, y) d\gamma(x, y)$$

where,  $\Gamma(\mu, \nu)$  denotes the collection of all measures of transports.

The optimal cost is the same as the definition of the  $W_1$  distance if the cost function is equivalent to the distance between point  $x$  and  $y$ .

The  $p^{th}$  Wasserstein distance between two probability distributions  $\mu$  and  $\nu$  in  $P_p(M)$  is defined as:

$$W_p(\mu, \nu) := \left( \inf_{\gamma \in \Gamma(\mu, \nu)} \int_{M \times M} d(x, y)^p d\gamma(x, y) \right)^{\frac{1}{p}},$$

where,  $(M, d)$  is a metric space,  $P_p(M)$  denotes the collection of all probability measures  $\mu$  on  $M$  and  $\Gamma(\mu, \nu)$  denotes the collection of all measures on  $M \times M$  with marginals  $\mu$  and  $\nu$  of  $x$  and  $y$  respectively.

In the current paper the  $W_1$  metric is used.

### Distinguishability

After stacking the real and synthetic datasets, using a binary classifier has been proposed as an approach for comparing two multivariate distributions [7], [8]. The estimated probability across all observations would then be used to compute a score. In our context the two datasets would be the real and synthetic datasets.

Adopting a perspective from the propensity score matching literature [9], a propensity mean square error metric has been proposed to evaluate the similarity of real and synthetic datasets [10], [11], which we will refer to as *propensityMSE*. To calculate the *propensityMSE*, a classifier is trained on a stacked dataset consisting of real observations labelled 1 and synthetic observations labelled 0. The *propensityMSE* score is computed as the mean squared difference of the estimated probability from the average prediction where it is not possible to distinguish between the two datasets. If the datasets are of the same size and indistinguishable, which is the assumption we make here, the average estimate will be 0.5:

$$propensityMSE = \frac{1}{N} \sum_i (p_i - 0.5)^2 \quad (5)$$

where  $N$  is the size of the stacked dataset, and  $p_i$  is the propensity score for observation  $i$ . The classifier is used to compute the  $p_i$  value where the training set is also used to compute the propensity score for each observation in the stacked dataset.

If the multivariate distributions of the two datasets are the same, then the probability will hover around 0.5, indicating that the classifier is not able to distinguish between them and the *propensityMSE* approaches zero. If the two datasets are completely different, then the classifier will be able to distinguish between them. In such a case the propensity score will be either zero or one, with *propensityMSE* approaching 0.25.

To make the metric more easily interpretable we can scale it to be between zero and one as follows (for the case when the two datasets are the same size):

$$\frac{1}{N} \sum_i \frac{(p_i - 0.5)^2}{0.25} \quad (6)$$

Another related approach that has been used to evaluate the utility of synthetic data is to take a prediction perspective rather than a propensity perspective. This has been applied with "human

discriminators” by asking a domain expert to manually classify sample records as real or synthetic [12]–[14]. This means that a sample of real records and a sample of synthetic records are drawn, and the two sets are shuffled together. Then the shuffled records are presented to clinicians who are expert in the domain and asked to subjectively discriminate between them by indicating which record is real versus synthetic. In this task the classification of every record is either correct or incorrect. A correct classification is not good in this case because it indicates that the real and synthetic data are more distinguishable. A real record that is classified as synthetic and a synthetic record that is classified as real are both considered good outcomes because the clinician was not able to tell the difference. High distinguishability only occurs when the human discriminator can correctly classify real and synthetic records.

The use of human discriminators is not scalable and therefore we can use machine learning algorithms trained on a training dataset and that make predictions on a hold-out test dataset. This approach mimics the subjective evaluations described above. We will refer to this metric as *predictionMSE*. Also note that this is different than the calculation of *propensityMSE* where the training dataset is also used to compute the probabilities.

The *predictionMSE* calculation needs to be adjusted so as not to penalize incorrect classification. For example, if a real record has a predicted probability less than 0.5 then this would be penalized under *propensityMSE*, but under the prediction approach this is an indicator that the discriminator is unable to distinguish between real and synthetic records. We therefore define the *predictionMSE*:

$$g_i = \begin{cases} p_i^{real} : & \left( \max(p_i^{real}, 0.5) - 0.5 \right)^2 / 0.25 \\ p_i^{syn} : & \left( \min(p_i^{syn}, 0.5) - 0.5 \right)^2 / 0.25 \end{cases} \quad (7)$$

where the full adjusted metric would be:

$$predictionMSE = \frac{1}{N} \sum_{i=1}^N g_i \quad (8)$$

This formulation does not penalize synthetic data that looks more like real data than it does like synthetic data. The concept of using prediction error for the stacked dataset has been considered before, but AUROC was used rather than the squared error [15].

## Appendix S3: Analysis Results

### Sequential Synthesis

| Data | hellinger   | lgc <sup>3</sup> | mmd <sup>4</sup> | propenMSE   | predMSE     | wass <sup>5</sup> | auroc       | auprc       |
|------|-------------|------------------|------------------|-------------|-------------|-------------------|-------------|-------------|
| 1    | 0.053520735 | -9.411165012     | 0.000445095      | 0.063772899 | 0.053446777 | 165.0590447       | 0.014289951 | 0.012558837 |
| 2    | 0.077104139 | -8.450672221     | 0.00042547       | 0.001539146 | 0.000498051 | 0.300491483       | 0.050477409 | 0.023283874 |
| 3    | 0.12815548  | -6.505201868     | 0.000178482      | 0.00018475  | 0.000102075 | 0.330844802       | 0.013706406 | 0.007774163 |
| 4    | 0.467965021 | -5.650757509     | 0.01721333       | 0.001801156 | 0.00115298  | 6.433722005       | 0.058819665 | 0.047396561 |
| 5    | 0.896110992 | -4.690169409     | 0.019045602      | 0.002401078 | 0.001153406 | 213.6377703       | 0.03686043  | 0.058839617 |
| 6    | 0.189015506 | -6.88790092      | 0.000395217      | 0.00044786  | 0.000208898 | 0.093797834       | 0.039262886 | 0.077835779 |
| 7    | 0.680869209 | -5.560410447     | 0.0095941        | 0.168007941 | 0.030325163 | 1.359139495       | 0.045159706 | 0.159459477 |
| 8    | 0.25943993  | -6.308478662     | 0.006487143      | 0.001759728 | 0.000791107 | 1.381272277       | 0.021854095 | 0.031310656 |
| 9    | 1           | -4.288180419     | 0.0204082        | 0.617698875 | 0.231393248 | 2.890557495       | 0.048395691 | 0.058707205 |
| 10   | 1           | -4.776083365     | 0.020618557      | 0.6373706   | 0.221576216 | 2.467043432       | 0.073541071 | 0.046952292 |
| 11   | 0.999999998 | -5.321196126     | 0.02173913       | 0.461406874 | 0.156158077 | 2.757909118       | 0.054966854 | 0.060608759 |
| 12   | 0.842158376 | -6.051642953     | 0.001028988      | 0.962573962 | 0.768830604 | 2.014853545       | 0.135038934 | 0.23998322  |
| 13   | 0.845818418 | -6.040428371     | 0.001028104      | 0.967678137 | 0.769551358 | 2.05258473        | 0.099651539 | 0.281608028 |
| 14   | 0.604983569 | -4.932445678     | 0.006167889      | 0.008734815 | 0.00257874  | 1.067555467       | 0.051260013 | 0.148542056 |
| 15   | 0.997946564 | -6.664806914     | NA               | 0.035667583 | 0.006907523 | 0.964773114       | 0.035269574 | 0.030341733 |
| 16   | 0.966570909 | -5.233848218     | 0.001836148      | 0.96209672  | 0.882134843 | 3.419219013       | 0.134013655 | 0.044748912 |
| 17   | 0.562561483 | -4.975351575     | NA               | 0.002751035 | 0.001503369 | 0.900174099       | 0.041571351 | 0.051815112 |
| 18   | 0.248562702 | -2.564739323     | 0.001335127      | 0.68967367  | 0.656936531 | 11.8777124        | 0.06192864  | 0.060721724 |
| 19   | 0.525627846 | -6.047856774     | 0.001409056      | 0.000668806 | 0.000337814 | 0.079576814       | 0.103612114 | 0.152366732 |
| 20   | 1           | -6.395720729     | NA               | 0.999878441 | 0.951256071 | 0.022862158       | 0.000227743 | 0.381523647 |
| 21   | 0.315461114 | -1.451784042     | 0.021027174      | 0.000597488 | 0.000262358 | 1.168186462       | 0.099614175 | 0.154500325 |

<sup>3</sup> We took the log of the  $U_c$  value to be consistent with the original article [16].

<sup>4</sup> Because the variables need to be converted to a binary representation, some of the less frequent categories are not generated in the synthetic datasets, which causes the calculation to be invalid.

<sup>5</sup> For nominal variables, the integer encoding can result in inflated distances.

|           |             |              |             |             |             |             |             |             |
|-----------|-------------|--------------|-------------|-------------|-------------|-------------|-------------|-------------|
| <b>22</b> | 0.300167914 | -4.962788354 | 0.001248801 | 0.000616819 | 0.000304652 | 0.081233259 | 0.023009008 | 0.030891455 |
| <b>23</b> | 0.025831233 | -10.88640466 | 0.000691433 | 0.006021694 | 0.003096619 | 0.394039559 | 3.51E-07    | 0.005865767 |
| <b>24</b> | 0.272949363 | -5.591368389 | 0.006227206 | 0.981999755 | 0.973084005 | 0.154295207 | 0.046806065 | 0.089173389 |
| <b>25</b> | 0.382372323 | -7.540376921 | 0.000358852 | 0.99901793  | 0.998757018 | 0.274196256 | 0.024998977 | 0.02626433  |
| <b>26</b> | 0.16795082  | -5.858555927 | 0.009809507 | 0.009599928 | 0.001625138 | 0.698603101 | 0.047616289 | 0.126904782 |
| <b>27</b> | 0.07271509  | -6.92736412  | 1.11E-03    | 0.311748242 | 0.171260301 | 0.772405438 | 0.013403708 | 0.02503817  |
| <b>28</b> | 0.911068385 | -6.078973345 | NA          | 0.543422229 | 0.058967994 | 6.158849287 | 8.76E-02    | 0.110049977 |
| <b>29</b> | 0.153798176 | -7.10573017  | 0.015839619 | 0.015707364 | 0.009671787 | 0.219053806 | 0.006509183 | 0.028674618 |
| <b>30</b> | 0.042289564 | -7.16299483  | 3.71E-04    | 0.004852046 | 0.002616708 | 0.139621066 | 0.00281873  | 0.010876145 |

**CTGAN**

| Data | hellinger   | lgc          | mmd         | propenMSE   | predMSE     | wass        | auroc       | auprc       |
|------|-------------|--------------|-------------|-------------|-------------|-------------|-------------|-------------|
| 1    | 0.114483375 | -4.92460737  | 0.000412667 | 0.942911862 | 0.925443096 | 1483.063644 | 0.007460151 | 0.020115969 |
| 2    | 0.50364019  | -3.346062334 | 0.035635267 | 0.922584196 | 0.803053734 | 0.844088564 | 0.292108274 | 0.154058627 |
| 3    | 0.589353543 | -2.165395963 | 0.082285033 | 0.80708701  | 0.710988142 | 0.46042899  | 0.31755332  | 0.251222487 |
| 4    | 0.706602114 | -2.89211302  | 0.017240961 | 0.878330067 | 0.642856294 | 38.03062978 | 0.189449167 | 0.078931258 |
| 5    | 0.973071501 | -2.527951679 | 0.019045924 | 0.985246851 | 0.858046792 | 563.2459919 | 0.361184207 | 0.323248359 |
| 6    | 0.343194815 | -5.446315908 | 0.00172322  | 0.27547596  | 0.112448552 | 0.140075812 | 0.116240159 | 0.08230844  |
| 7    | 0.744079066 | -3.557856353 | 0.009593388 | 0.964519492 | 0.803766204 | 3.864892562 | 0.408745126 | 0.553150876 |
| 8    | 0.475731179 | -4.293722943 | 0.00663916  | 0.657444536 | 0.481239152 | 3.287835455 | 0.308963128 | 0.400604508 |
| 9    | 1           | -2.119851881 | 0.0204082   | 0.999826403 | 0.922598855 | 9.727659953 | 0.049230841 | 0.271274527 |
| 10   | 1           | -1.585258751 | 0.020618557 | 0.999940445 | 0.962376972 | 11.76671547 | 0.061378012 | 0.213130033 |
| 11   | 1           | -2.136444061 | 0.02173913  | 0.999935813 | 0.960805353 | 9.753606485 | 0.055330262 | 0.297747608 |
| 12   | 0.945607165 | -4.159615247 | 0.001021587 | 0.998949283 | 0.965145208 | 3.861047977 | 0.03948376  | 0.12840464  |
| 13   | 0.922793004 | -4.812829603 | 0.001020807 | 0.999305794 | 0.968650885 | 4.458988797 | 0.202588274 | 0.396001754 |
| 14   | 0.855410008 | -2.690568045 | 0.013108804 | 0.930628412 | 0.687955237 | 0.621264166 | 0.48746811  | 0.703488009 |
| 15   | 0.99930741  | -3.620974025 | 0.007189938 | 0.997310194 | 0.838966978 | 0.290532682 | 0.285438568 | 0.085361896 |
| 16   | 0.997453158 | -2.392738625 | 0.001836262 | 0.999904229 | 0.986829569 | 5.509245232 | 0.158306267 | 0.08664414  |
| 17   | 0.641508173 | -2.721228933 | 0.021166222 | 0.873988073 | 0.657072645 | 2.56066187  | 0.244748886 | 0.191869817 |
| 18   | 0.61638154  | -1.896836603 | 0.001335127 | 0.999663989 | 0.985879664 | 19.34272946 | 0.035906247 | 0.171503645 |
| 19   | 0.632699015 | -5.561445351 | 0.003486727 | 0.360246968 | 0.19090567  | 0.099121622 | 0.284860139 | 0.446442718 |
| 20   | 1           | -4.42765826  | 0.021292023 | 0.999992718 | 0.99689002  | 0.078135807 | 0.394712901 | 0.766599768 |
| 21   | 0.326164979 | -5.156927554 | 0.001416157 | 0.009776574 | 0.009712449 | 0.108812261 | 0.06715464  | 0.130947453 |
| 22   | 0.35569447  | -6.637024311 | 0.001792854 | 0.432367501 | 0.255786179 | 0.072700893 | 0.271238247 | 0.193921703 |
| 23   | 0.106820164 | -4.90254152  | 0.00096344  | 0.235050664 | 0.189466601 | 1.328482445 | 0.003472501 | 0.162385569 |
| 24   | 0.469061301 | -2.912560181 | NA          | 0.999335541 | 0.998298167 | 0.594054005 | 0.020486876 | 0.118627977 |
| 25   | 0.718930696 | -3.87232962  | NA          | 0.999999197 | 0.999938352 | 1.136337672 | 0.319773476 | 0.366386107 |
| 26   | 0.448587653 | -2.777350063 | 0.040231065 | 0.923121131 | 0.788543478 | 3.904886047 | 0.414553415 | 0.500295993 |
| 27   | 0.346112085 | -4.910507285 | 0.019317847 | 0.730263256 | 0.600534187 | 1.23782129  | 0.257562394 | 0.346412341 |



|           |             |              |             |             |             |             |             |             |
|-----------|-------------|--------------|-------------|-------------|-------------|-------------|-------------|-------------|
| <b>28</b> | 0.976392787 | -4.908078906 | 0.00660066  | 9.97E-01    | 0.823461188 | 12.20846239 | 0.226371585 | 0.207017498 |
| <b>29</b> | 0.144411441 | -4.286725491 | 0.04286848  | 0.293045441 | 0.238957138 | 0.913382533 | 0.009621811 | 0.210900816 |
| <b>30</b> | 0.158231201 | -5.477202961 | 0.001250063 | 0.255206719 | 2.03E-01    | 0.390392876 | 0.071639984 | 0.236903452 |

## Bayesian Network

| Data | hellinger   | lgc        | mmd         | propenMSE   | predMSE     | wass        | auroc       | auprc       |
|------|-------------|------------|-------------|-------------|-------------|-------------|-------------|-------------|
| 1    | 0.247133562 | -1.9064696 | 0.000412705 | 0.99575166  | 0.989854649 | 37744.47505 | 0.082919889 | 0.09295752  |
| 2    | 0.546767984 | -2.3569115 | NA          | 0.922517815 | 0.842497793 | 2.135548451 | 0.488380603 | 0.48823881  |
| 3    | 0.620147895 | -2.1709452 | NA          | 0.835345025 | 0.735075952 | 2.11704978  | 0.452903126 | 0.484087882 |
| 4    | 0.706877704 | -3.0243963 | NA          | 0.914661437 | 0.735426612 | 44.70093089 | 0.191240392 | 0.299517404 |
| 5    | 0.973602548 | -1.733155  | 0.019045924 | 0.869269379 | 0.782275363 | 8143.479319 | 0.380047925 | 0.370618267 |
| 6    | 0.348764067 | -3.1971974 | 0.021386195 | 0.770651214 | 0.619492458 | 0.476064982 | 0.079478214 | 0.092450051 |
| 7    | 0.75765177  | -2.1731502 | 0.009598477 | 0.969778069 | 0.828412116 | 12.07446972 | 0.371605613 | 0.333196972 |
| 8    | 0.469325336 | -2.2965761 | NA          | 0.908070978 | 0.736686325 | 10.67467704 | 0.310263611 | 0.364599119 |
| 9    | 1           | -1.8776601 | NA          | 0.989955162 | 0.94360149  | 9.562090028 | 0.048398799 | 0.188307684 |
| 10   | 1           | -1.7812539 | NA          | 0.98628881  | 0.922617054 | 12.23948368 | 0.062601058 | 0.324900397 |
| 11   | 1           | -2.4406461 | NA          | 0.998291372 | 0.921463594 | 8.195475787 | 0.046430035 | 0.229417971 |
| 12   | 0.967467176 | -1.5581497 | NA          | 0.999735183 | 0.994236139 | 26.8873786  | 0.445550453 | 0.503271638 |
| 13   | 0.968117521 | -1.5541744 | NA          | 0.99918262  | 0.993854011 | 26.9300682  | 0.457859832 | 0.606196385 |
| 14   | 0.861416337 | -3.5935751 | NA          | 0.994868566 | 0.956769321 | 0.98782921  | 0.309035257 | 0.577678412 |
| 15   | 0.999770708 | -4.3859152 | NA          | 0.998552584 | 0.977524892 | 0.486262223 | 0.120542492 | 0.383953935 |
| 16   | 0.997529541 | -1.9289823 | NA          | 0.997561483 | 0.987042013 | 21.19668054 | 0.247726476 | 0.327538791 |
| 17   | 0.651043863 | -3.2716399 | 0.020593438 | 0.764573289 | 0.509284513 | 2.251553063 | 0.266233958 | 0.210578485 |
| 18   | 0.921614221 | -1.581402  | NA          | 0.999539015 | 0.999006253 | 23010.45159 | 0.126891127 | 0.153364621 |
| 19   | 0.636603249 | -2.9692647 | NA          | 0.834990844 | 0.648599859 | 0.452098151 | 0.29894258  | 0.540588039 |
| 20   | 1           | -1.9220571 | 0.172137511 | 0.999631314 | 0.995420314 | 0.23276242  | 0.50199115  | 0.847716673 |
| 21   | 0.357696977 | -2.664996  | 0.046520097 | 0.654625026 | 0.546801785 | 0.336845466 | 0.117524729 | 0.140452779 |
| 22   | 0.37542924  | -4.2188914 | NA          | 0.892057837 | 0.787368235 | 0.44360119  | 0.233348002 | 0.215023441 |
| 23   | 0.259998707 | -3.1638624 | 0.001044381 | 0.601975991 | 0.551779301 | 4.554311152 | 0.127687949 | 0.467034189 |
| 24   | 0.483444959 | -1.7449915 | 0.093779355 | 0.979699735 | 0.947815631 | 3.413553867 | 0.04160945  | 0.317904229 |
| 25   | 0.77978103  | -1.506563  | 0.000582576 | 0.997410932 | 0.988127555 | 25.10613017 | 0.317784229 | 0.421103049 |
| 26   | 0.454107775 | -1.860538  | NA          | 0.968936451 | 0.912496533 | 11.15575216 | 0.482978196 | 0.547865664 |
| 27   | 0.332591925 | -1.8105487 | 0.138999649 | 0.939601052 | 0.892255256 | 36.16548851 | 0.206866136 | 0.225963344 |

|           |             |            |             |             |             |             |             |             |
|-----------|-------------|------------|-------------|-------------|-------------|-------------|-------------|-------------|
| <b>28</b> | 0.97414672  | -2.8528429 | 0.00660066  | 0.999390804 | 0.984422712 | 74.69310922 | 0.199617732 | 0.052584344 |
| <b>29</b> | 0.187659027 | -2.9485405 | 3.74E-02    | 0.763302205 | 0.677658511 | 2.079594999 | 0.130740637 | 0.392491527 |
| <b>30</b> | 0.350916214 | -1.5083984 | 0.009491316 | 0.963919095 | 0.950507062 | 43.53385604 | 0.403687728 | 0.684383417 |

## Appendix S4: Prediction Accuracy

The following synthetic data values are the average across 20 synthetic datasets. They were used to compute the AUROC and AUPRC differences. Note that for each SDG method the real data LR model was re-estimated and therefore the values are slightly different due to cross-validation partitions being different.

### Sequential Synthesis

| Data | real_auroc  | syn_auroc   | real_auprc | syn_auprc |
|------|-------------|-------------|------------|-----------|
| 1    | 0.758337414 | 0.743908559 | 0.747931   | 0.734633  |
| 2    | 0.989529692 | 0.938038253 | 0.999699   | 0.977657  |
| 3    | 0.962829392 | 0.950075618 | 0.989      | 0.983208  |
| 4    | 0.726677489 | 0.699180167 | 0.811209   | 0.809474  |
| 5    | 0.875631488 | 0.85527904  | 0.536727   | 0.524573  |
| 6    | 0.624840866 | 0.660369968 | 0.464413   | 0.57346   |
| 7    | 0.916044554 | 0.876634379 | 0.934816   | 0.764252  |
| 8    | 0.826387181 | 0.814547615 | 0.875132   | 0.898516  |
| 9    | 0.564650856 | 0.561451798 | 0.710358   | 0.671833  |
| 10   | 0.536479277 | 0.563003629 | 0.845624   | 0.82235   |
| 11   | 0.554463109 | 0.57319603  | 0.745436   | 0.722516  |
| 12   | 0.948697211 | 0.81044978  | 0.840116   | 0.596171  |
| 13   | 0.961375359 | 0.861880061 | 0.713498   | 0.429498  |
| 14   | 0.988357847 | 0.934316063 | 0.882512   | 0.724672  |
| 15   | 0.792289994 | 0.792534261 | 0.891474   | 0.885999  |
| 16   | 0.750482536 | 0.610760269 | 0.86869    | 0.820992  |
| 17   | 0.773001323 | 0.791179201 | 0.539803   | 0.555758  |
| 18   | 0.627072241 | 0.563712368 | 0.619397   | 0.553989  |
| 19   | 0.78443563  | 0.704173678 | 0.790395   | 0.662167  |
| 20   | 0.999931141 | 0.999869425 | 0.976136   | 0.593892  |
| 21   | 0.473868874 | 0.555334478 | 0.25829    | 0.381852  |
| 22   | 0.774262461 | 0.76288002  | 0.288286   | 0.279971  |
| 23   | 0.5         | 0.5         | 0.082271   | 0.077881  |
| 24   | 0.514483101 | 0.553213083 | 0.238643   | 0.297639  |
| 25   | 0.966776054 | 0.941499854 | 0.496138   | 0.489429  |

|           |             |             |          |          |
|-----------|-------------|-------------|----------|----------|
| <b>26</b> | 0.993204419 | 0.947282481 | 0.897648 | 0.773224 |
| <b>27</b> | 0.772477158 | 0.76950541  | 0.798916 | 0.800872 |
| <b>28</b> | 0.727708789 | 0.670285682 | 0.524958 | 0.454522 |
| <b>29</b> | 0.509587395 | 0.50387905  | 0.254459 | 0.231487 |
| <b>30</b> | 0.507783829 | 0.50832476  | 0.219282 | 0.216995 |

**CTGAN**

| <b>Data</b> | <b>real_auroc</b> | <b>syn_auroc</b> | <b>real_auprc</b> | <b>syn_auprc</b> |
|-------------|-------------------|------------------|-------------------|------------------|
| <b>1</b>    | 0.758498          | 0.765654         | 0.748106          | 0.767564         |
| <b>2</b>    | 0.988996          | 0.698383         | 0.999679          | 0.848532         |
| <b>3</b>    | 0.961307          | 0.63796          | 0.98916           | 0.736829         |
| <b>4</b>    | 0.728841          | 0.52352          | 0.814177          | 0.749789         |
| <b>5</b>    | 0.880221          | 0.509748         | 0.54155           | 0.203446         |
| <b>6</b>    | 0.61757           | 0.491042         | 0.458533          | 0.374704         |
| <b>7</b>    | 0.912884          | 0.514221         | 0.923662          | 0.371159         |
| <b>8</b>    | 0.823341          | 0.513056         | 0.873446          | 0.473714         |
| <b>9</b>    | 0.550962          | 0.558486         | 0.70113           | 0.420435         |
| <b>10</b>   | 0.54903           | 0.550932         | 0.856719          | 0.625126         |
| <b>11</b>   | 0.577954          | 0.562201         | 0.749689          | 0.448526         |
| <b>12</b>   | 0.948226          | 0.988671         | 0.840835          | 0.970665         |
| <b>13</b>   | 0.96142           | 0.758892         | 0.712225          | 0.314424         |
| <b>14</b>   | 0.989736          | 0.494586         | 0.887725          | 0.18128          |
| <b>15</b>   | 0.792394          | 0.500926         | 0.885807          | 0.796553         |
| <b>16</b>   | 0.749719          | 0.592164         | 0.868401          | 0.779497         |
| <b>17</b>   | 0.773104          | 0.538805         | 0.536377          | 0.356569         |
| <b>18</b>   | 0.626466          | 0.663247         | 0.619184          | 0.791573         |
| <b>19</b>   | 0.787497          | 0.506575         | 0.783802          | 0.34877          |
| <b>20</b>   | 0.999968          | 0.600866         | 0.97701           | 0.205062         |
| <b>21</b>   | 0.482896          | 0.524985         | 0.249028          | 0.386454         |
| <b>22</b>   | 0.770301          | 0.497383         | 0.284825          | 0.095026         |
| <b>23</b>   | 0.5               | 0.503191         | 0.082591          | 0.244358         |

|    |          |          |          |          |
|----|----------|----------|----------|----------|
| 24 | 0.518816 | 0.501898 | 0.238685 | 0.340603 |
| 25 | 0.967171 | 0.640571 | 0.493994 | 0.126236 |
| 26 | 0.993856 | 0.578109 | 0.904026 | 0.404304 |
| 27 | 0.773741 | 0.510273 | 0.803527 | 0.44426  |
| 28 | 0.737133 | 0.50174  | 0.535839 | 0.328978 |
| 29 | 0.5095   | 0.5      | 0.252718 | 0.034132 |
| 30 | 0.507623 | 0.580011 | 0.219697 | 0.457873 |

### Bayesian Network

| Data | real_auroc | syn_auroc | real_auprc | syn_auprc |
|------|------------|-----------|------------|-----------|
| 1    | 0.758142   | 0.675311  | 0.747922   | 0.65496   |
| 2    | 0.989277   | 0.507335  | 0.999694   | 0.512796  |
| 3    | 0.959741   | 0.510917  | 0.988631   | 0.510332  |
| 4    | 0.725227   | 0.543033  | 0.811434   | 0.530498  |
| 5    | 0.875808   | 0.479279  | 0.535723   | 0.169572  |
| 6    | 0.608826   | 0.527565  | 0.454086   | 0.547506  |
| 7    | 0.917295   | 0.536314  | 0.938928   | 0.597919  |
| 8    | 0.816592   | 0.520897  | 0.862298   | 0.500824  |
| 9    | 0.581897   | 0.552274  | 0.71187    | 0.497205  |
| 10   | 0.523543   | 0.547317  | 0.852866   | 0.524696  |
| 11   | 0.557279   | 0.55112   | 0.731765   | 0.522933  |
| 12   | 0.948642   | 0.500249  | 0.841233   | 0.336071  |
| 13   | 0.960547   | 0.500656  | 0.710127   | 0.102175  |
| 14   | 0.988147   | 0.679997  | 0.886689   | 0.304223  |
| 15   | 0.791333   | 0.647315  | 0.88975    | 0.493995  |
| 16   | 0.748336   | 0.496167  | 0.867405   | 0.537961  |
| 17   | 0.774246   | 0.512317  | 0.543819   | 0.342775  |
| 18   | 0.627062   | 0.499847  | 0.619283   | 0.465439  |
| 19   | 0.788076   | 0.494728  | 0.796475   | 0.254498  |
| 20   | 0.999832   | 0.491398  | 0.975738   | 0.125457  |
| 21   | 0.461107   | 0.582628  | 0.255496   | 0.397078  |

|           |          |          |          |          |
|-----------|----------|----------|----------|----------|
| <b>22</b> | 0.772113 | 0.529853 | 0.284631 | 0.068543 |
| <b>23</b> | 0.5      | 0.627472 | 0.082408 | 0.549978 |
| <b>24</b> | 0.514713 | 0.548012 | 0.23995  | 0.558268 |
| <b>25</b> | 0.96762  | 0.648961 | 0.495363 | 0.073739 |
| <b>26</b> | 0.99432  | 0.510752 | 0.903662 | 0.34683  |
| <b>27</b> | 0.772119 | 0.568908 | 0.799393 | 0.571657 |
| <b>28</b> | 0.735188 | 0.529235 | 0.531059 | 0.567726 |
| <b>29</b> | 0.50931  | 0.635766 | 0.253335 | 0.643381 |
| <b>30</b> | 0.508237 | 0.911422 | 0.219738 | 0.903405 |

## Appendix S5: Results Plots

The following are the plots showing the prediction performance rank for the utility metrics not shown in the main body of the paper. For all the plots the three SDG methods were ordered based on their relative utility metric values into the “H”, “M”, and “L” groups.

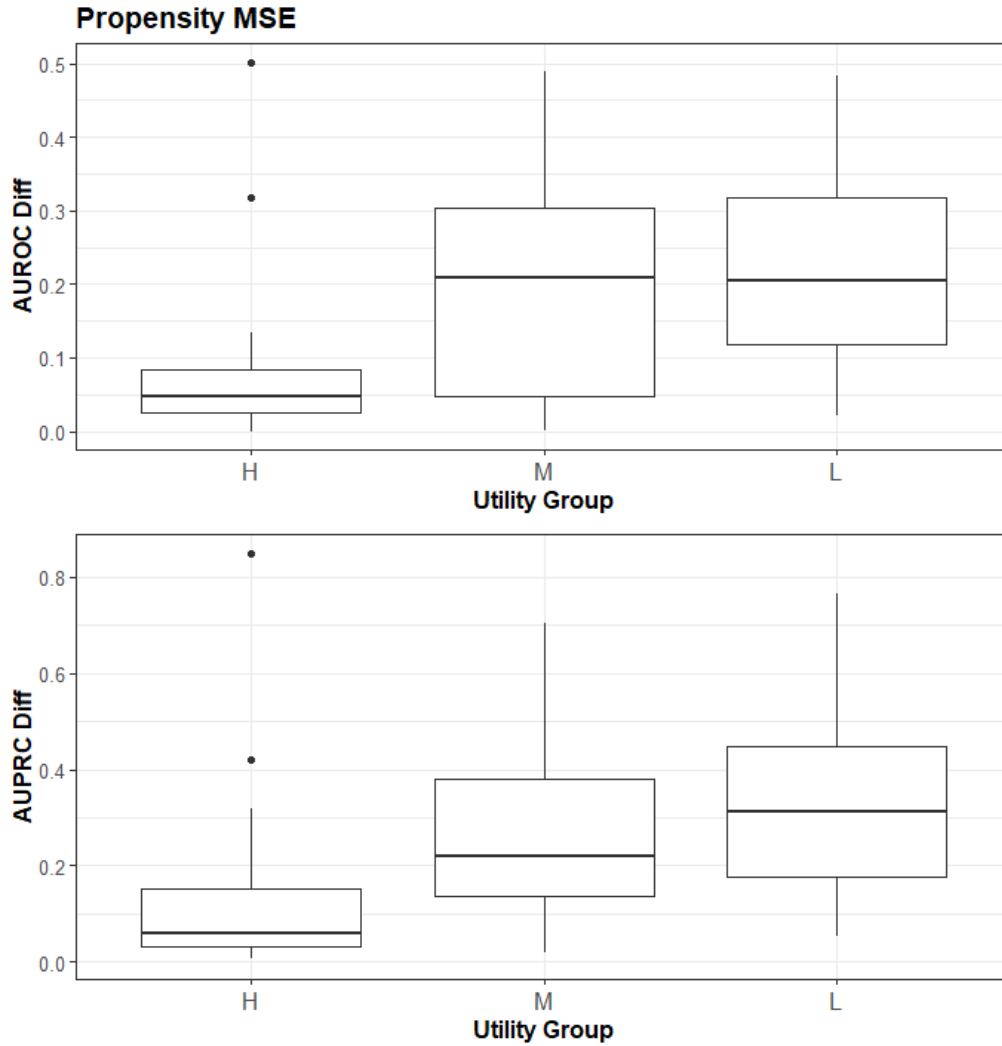

**Figure 1:** The relationship between the propensity MSE vs the AUROC and AUPRC.



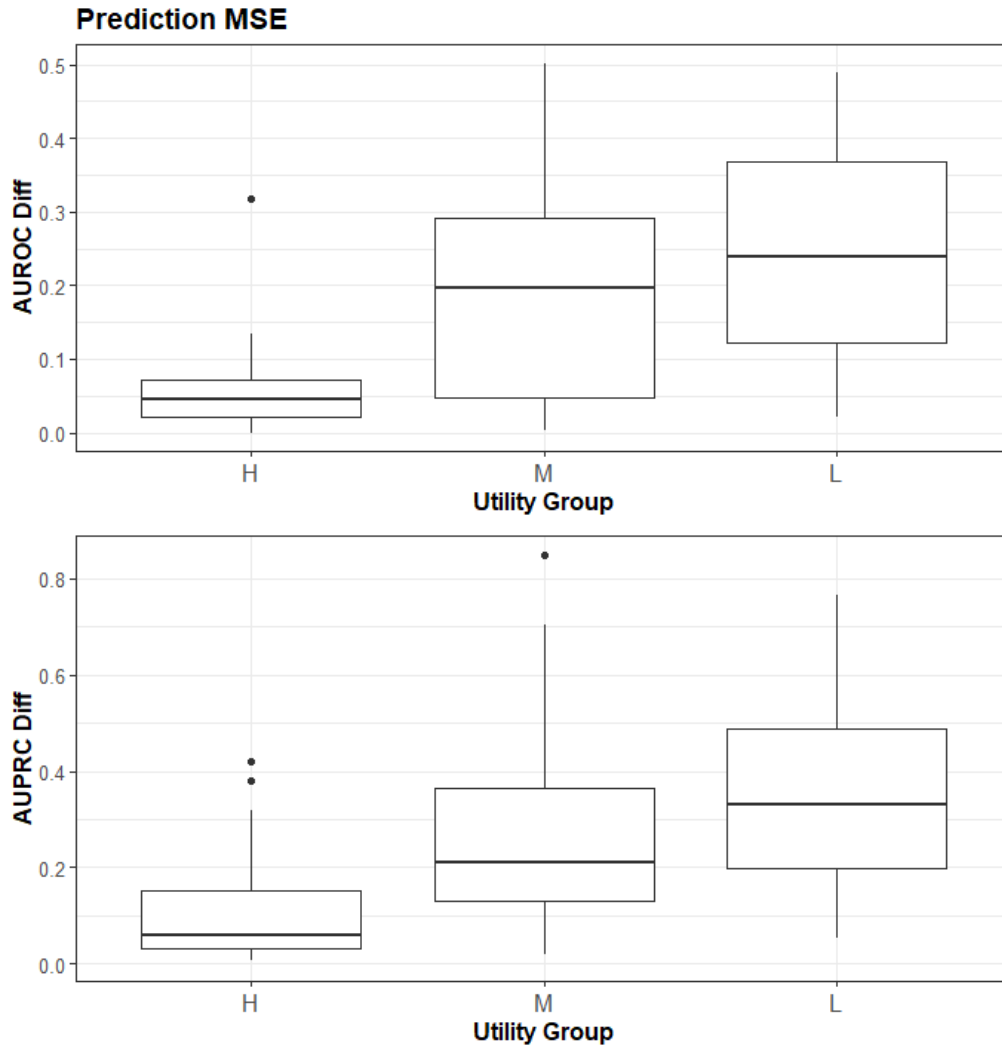

**Figure 2:** The relationship between the prediction MSE vs the AUROC and AUPRC.

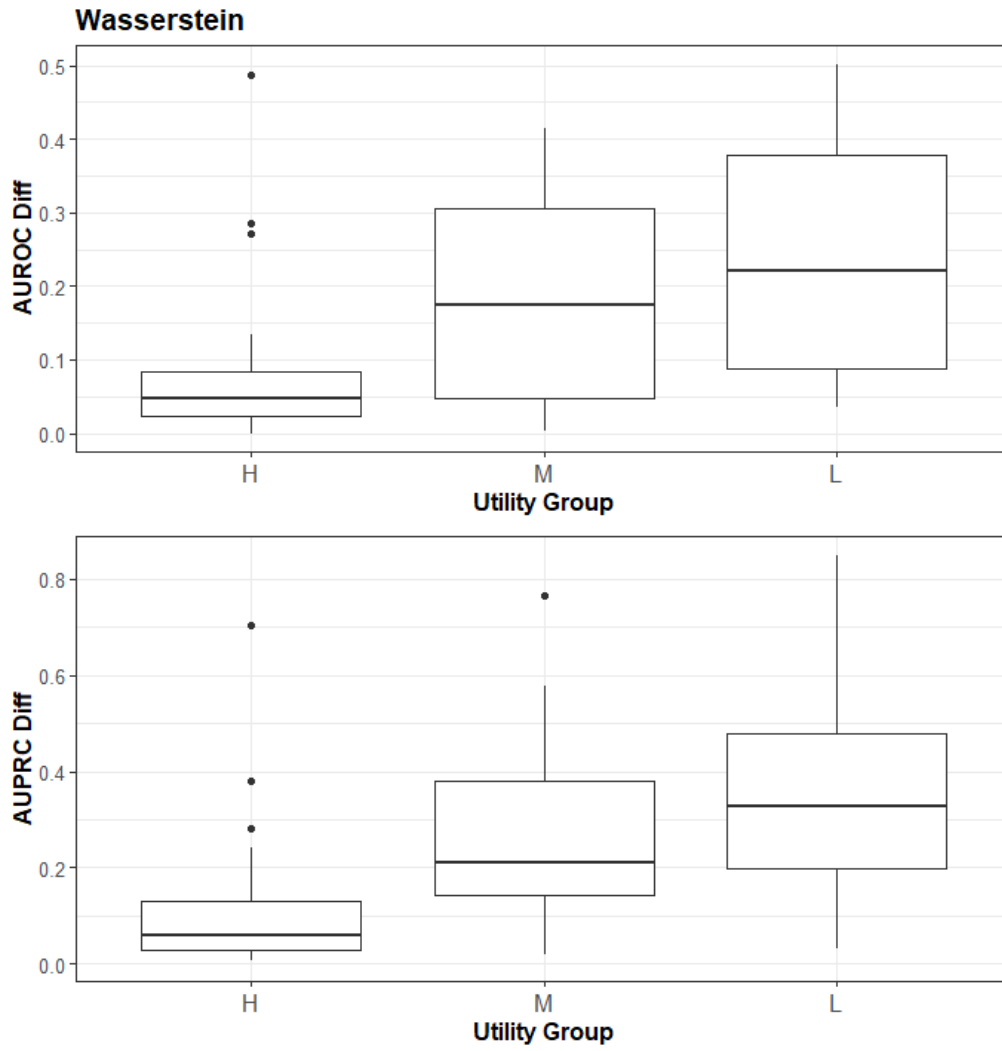

**Figure 3:** The relationship between the Wasserstein distance vs the AUROC and AUPRC.

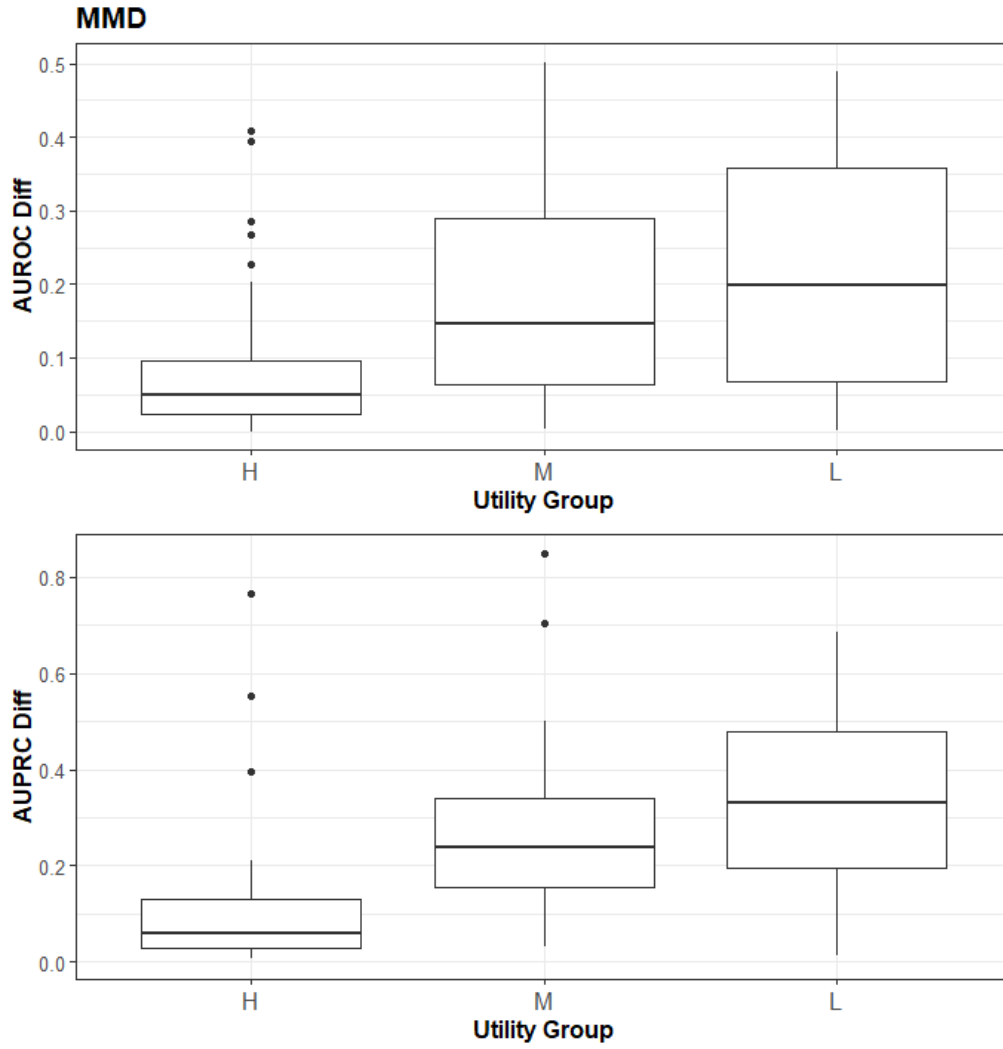

**Figure 4:** The relationship between MMD vs the AUROC and AUPRC.

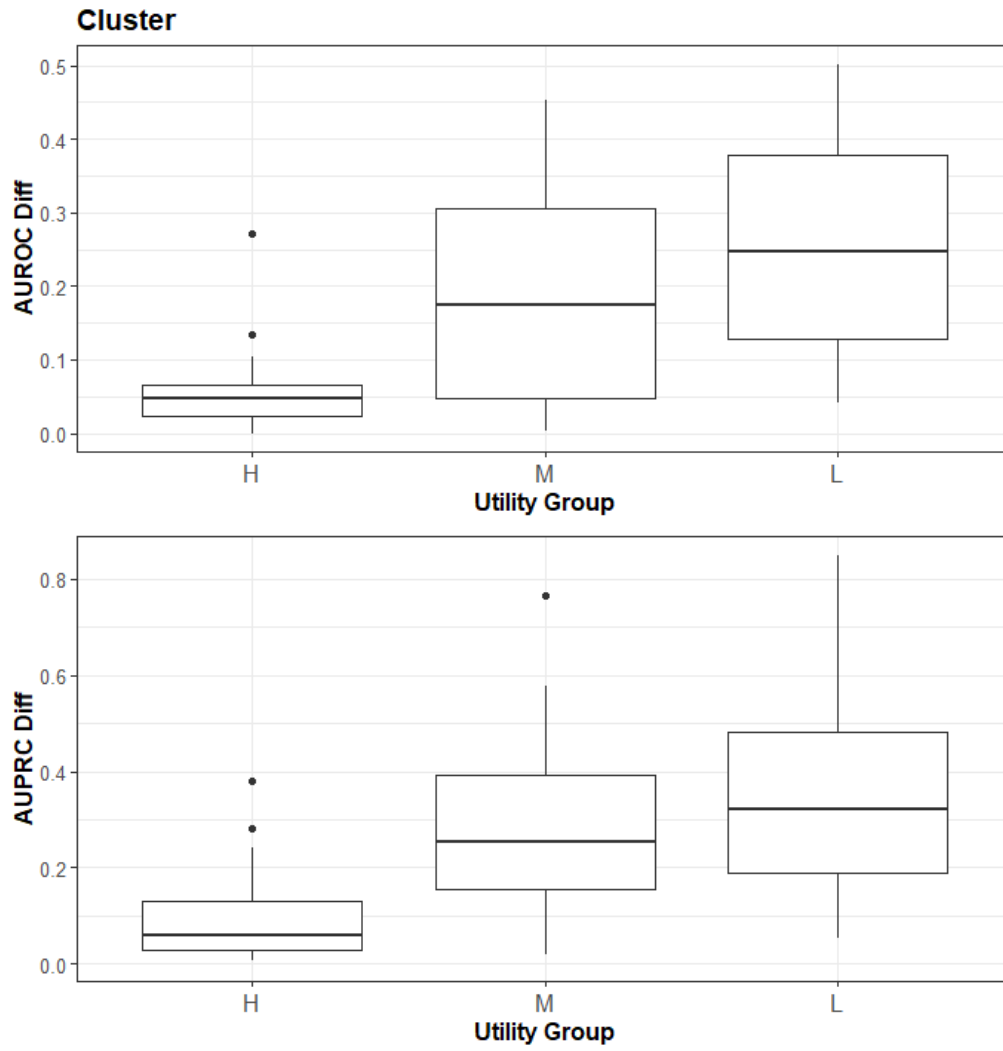

**Figure 5:** The relationship between the cluster distance vs the AUROC and AUPRC.

## References

- [1] CEO Life Sciences Consortium, "Share, Integrate & Analyze Cancer Research Data | Project Data Sphere." <https://projectdatasphere.org/projectdatasphere/html/home>
- [2] A. El-Hussuna, T. Lytras, N. H. Bruun, M. F. Klein, S. H. Emile, and N. Qvist, "Extended Right-Sided Colon Resection Does Not Reduce the Risk of Colon Cancer Local-Regional Recurrence: Nationwide Population-Based Study from Danish Colorectal Cancer Group Database," *Diseases of the Colon & Rectum*, p. 10.1097/DCR.0000000000002358, 2022, doi: 10.1097/DCR.0000000000002358.
- [3] Anil Kumar Bhattacharya, "On a Measure of Divergence between Two Multinomial Populations," *The Indian Journal of Statistics*, vol. 7, no. 4, pp. 401–406, 1946.
- [4] Oleg Michailovich, Yogesh Rathi, and Allen Tannenbaum, "Image Segmentation Using Active Contours Driven by the Bhattacharyya Gradient Flow," *IEEE Transactions on Image Processing*, vol. 16, no. 11, pp. 2787–2801, 2007, doi: 10.1109/TIP.2007.908073.
- [5] Euisun Choi and Chulhee Lee, "Feature extraction based on the Bhattacharyya distance," *Pattern Recognition*, vol. 36, no. 8, pp. 1703–1709, 2003, doi: [https://doi.org/10.1016/S0031-3203\(03\)00035-9](https://doi.org/10.1016/S0031-3203(03)00035-9).
- [6] K. G. Derpanis, "The Bhattacharyya Measure." 2008.
- [7] Jerome Friedman, "On Multivariate Goodness-of-Fit and Two-Sample Testing," Stanford University, 2003.
- [8] S. Hediger, L. Michel, and J. Näf, "On the Use of Random Forest for Two-Sample Testing," *arXiv:1903.06287 [stat]*, Apr. 2019, Accessed: May 06, 2020. [Online]. Available: <http://arxiv.org/abs/1903.06287>
- [9] P. R. Rosenbaum and D. B. Rubin, "The central role of the propensity score in observational studies for causal effects," *Biometrika*, vol. 70, no. 1, pp. 41–55, Apr. 1983, doi: 10.1093/biomet/70.1.41.
- [10] M.-J. Woo, J. P. Reiter, A. Oganian, and A. F. Karr, "Global Measures of Data Utility for Microdata Masked for Disclosure Limitation," *Journal of Privacy and Confidentiality*, vol. 1, no. 1, Apr. 2009, doi: 10.29012/jpc.v1i1.568.
- [11] J. Snoke, G. M. Raab, B. Nowok, C. Dibben, and A. Slavkovic, "General and specific utility measures for synthetic data," *Journal of the Royal Statistical Society: Series A (Statistics in Society)*, vol. 181, no. 3, pp. 663–688, Jun. 2018, doi: 10.1111/rssa.12358.
- [12] B. K. Beaulieu-Jones, Z. S. Wu, C. Williams, and C. S. Greene, "Privacy-preserving generative deep neural networks support clinical data sharing," *bioRxiv*, p. 159756, Jul. 2017, doi: 10.1101/159756.
- [13] E. Choi, S. Biswal, B. Malin, J. Duke, W. F. Stewart, and J. Sun, "Generating Multi-label Discrete Patient Records using Generative Adversarial Networks," in *Machine Learning for Healthcare Conference*, 2017, vol. 68, pp. 286–305. [Online]. Available: <http://proceedings.mlr.press/v68/choi17a/choi17a.pdf>
- [14] A. Salim Jr, "Synthetic Patient Generation: A Deep Learning Approach Using Variational Autoencoders," *arXiv:1808.06444 [cs, stat]*, Aug. 2018, Accessed: Aug. 06, 2021. [Online]. Available: <http://arxiv.org/abs/1808.06444>
- [15] G. Muniz-Terrera, O. Mendelevitch, R. Barnes, and M. D. Lesh, "Virtual Cohorts and Synthetic Data in Dementia: An Illustration of Their Potential to Advance Research," *Front. Artif. Intell.*, vol. 4, 2021, doi: 10.3389/frai.2021.613956.
- [16] A. Goncalves, P. Ray, B. Soper, J. Stevens, L. Coyle, and A. P. Sales, "Generation and evaluation of synthetic patient data," *BMC Med Res Methodol*, vol. 20, no. 1, p. 108, Dec. 2020, doi: 10.1186/s12874-020-00977-1.
